# Supplementary material for: One-pot synthesis of xanthones from 2-nitrobenzyl alcohol and phenol catalyzed by Cu(OTf) 2 -1,10-phenanthroline
Source: Royal Society of Chemistry journal article supplement (doi:10.1039/d5ob00648a), 2025-01-01

## Supporting information

### Synthesis of xanthenes from the one-pot reaction of 2-nitrobenzyl alcohol with phenol catalyzed by Cu(OTf)<sub>2</sub>-1,10-phenanthroline complex

Zheng Zhang,<sup>a</sup> Bing-Bing Pan,<sup>a</sup> Long Wei,<sup>ab</sup> Xiao-Ning Feng,<sup>a</sup> Yan Zhou,<sup>a</sup> Qing-Dong Liu,<sup>a</sup> Ling-Feng Gao,<sup>\*ab</sup> Sun Su,<sup>a</sup> and Geng-Xiu Zheng<sup>a</sup>

<sup>a</sup>School of Chemistry and Chemical Engineering, University of Jinan, Jinan, Shandong, No. 336 West Road of NanXinzhuang, Jinan 250022, China.

<sup>b</sup>Shandong China Recycling Resource Biotechnology Co. Ltd, No.1003, Futai Road, Taiping Town, Zoucheng City, Shandong Province.

## Contents

|                                                     |   |
|-----------------------------------------------------|---|
| General remarks .....                               | 1 |
| General experimental procedure .....                | 1 |
| Liquid chromatogram.....                            | 2 |
| Synthesis reactions with different substrates ..... | 3 |
| Characterization data of all substances .....       | 3 |
| NMR Spectra of all compounds.....                   | 9 |

### General remarks

Unless otherwise indicated, all commercially reagents and solvents were used directly without further purification. <sup>1</sup>H NMR and <sup>13</sup>C NMR were recorded at ambient temperature in CDCl<sub>3</sub>. Chemical shift values are expressed as parts per million (ppm) and J values are in Hertz. Splitting patterns are indicated as s: singlet, d: doublet, t: triplet, q: quartet or combination, br. s broad singlet, m: multiplet. HRMS were recorded on the TOF-HRMS-EI at the Instruments' Center for Physical Science, University of Ji Nan.

### General experimental procedure

2-Nitrobenzyl alcohol (76.2 mg, 0.5 mmol) and phenol (47 mg, 0.5 mmol) were placed into a 10 ml dry round-bottom flask. To this, 1 ml of redistilled toluene was added as the solvent. Anhydrous Cu(OTf)<sub>2</sub> (36.4 mg, 0.1 mmol) catalyst, 1,10-phenanthroline (18 mg, 0.1 mmol) ligand, and potassium phosphate (212 mg, 1 mmol) were subsequently introduced. The reaction mixture was heated and refluxed with rapid stirring for 12 hours. The reaction can proceed effectively both in the presence of O<sub>2</sub> and under the exclusion of oxygen. The progress of the reaction was monitored by thin-layer chromatography (TLC). After the reaction was completed, it was cooled to

room temperature, extracted by (15mL×3) EtOAc, washed with saturated saline, the organic phases were combined, dried with anhydrous sodium sulfate for more than 30 min, rotary evaporation of solvent, and the target product was obtained by column chromatography separation of 20/1=petroleum ether:EtOAc, a light-yellow solid of 110.8 mg, and the structure was determined by solvent NMR detection done with CDCl<sub>3</sub>.

## Liquid chromatogram

Figure 1 The chromatogram of 2-nitrobenzyl alcohol

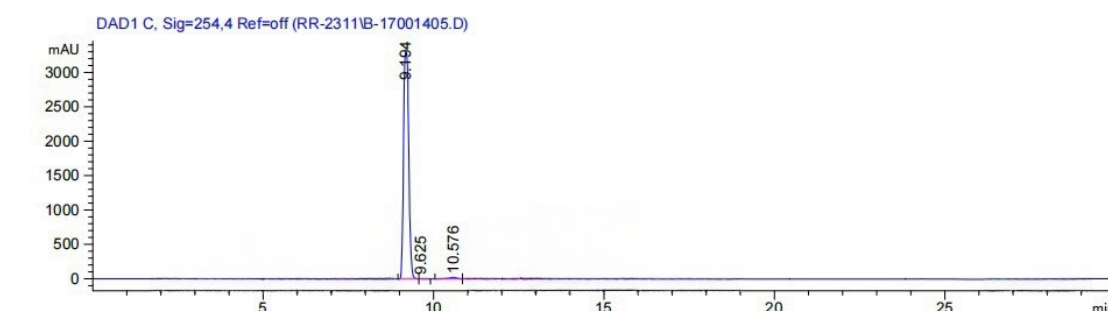

Figure 2 The chromatogram of 2-nitrobenzaldehyde

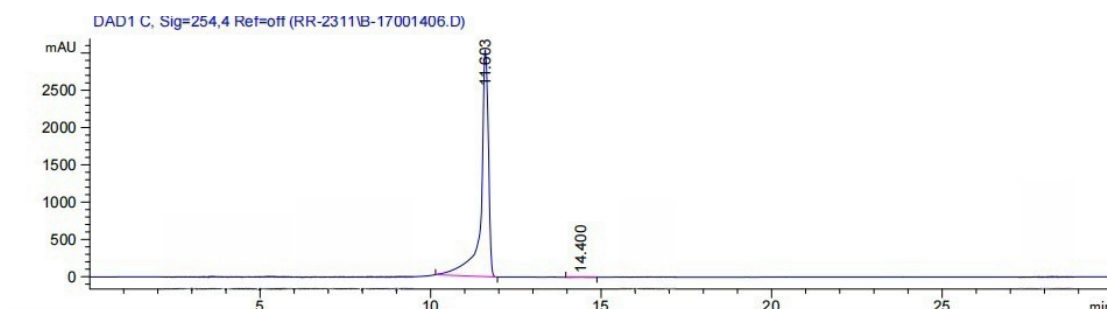

Figure 3 The chromatogram of the xanthone product 3aa generated from the reaction under O<sub>2</sub> conditions

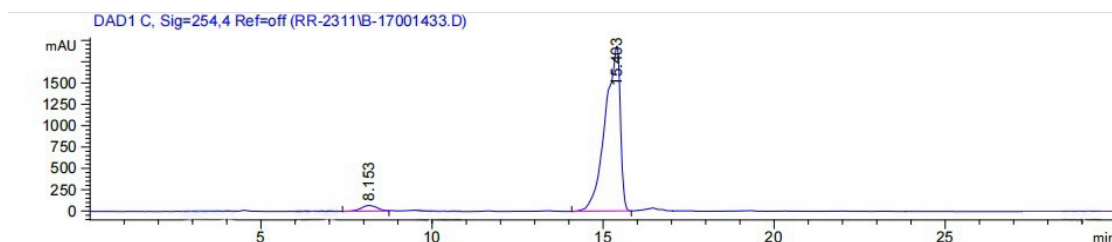

Figure 4 The chromatogram of the xanthone product 3aa generated from the reaction under N<sub>2</sub> conditions

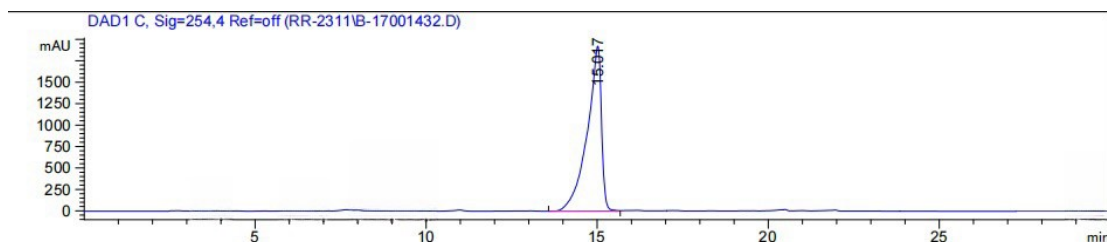

## Synthesis reactions with different substrates

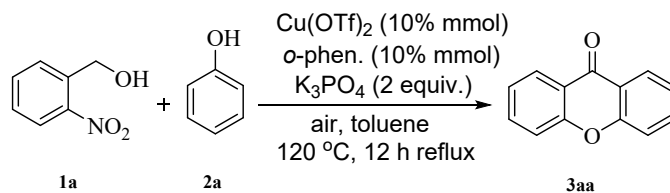

| Entry | 1a                 | 2a                                  | T/°C | Product | Yield(%) <sup>a,b</sup> |
|-------|--------------------|-------------------------------------|------|---------|-------------------------|
| 1     | 5-H                | H                                   | 120  | 3aa     | 88                      |
| 2     | 5-H                | 2-CH <sub>3</sub>                   | 120  | 3ab     | 69                      |
| 3     | 5-H                | 4-CH <sub>3</sub>                   | 120  | 3ac     | 82                      |
| 4     | 5-H                | 2-CH <sub>2</sub> CH <sub>3</sub>   | 120  | 3ad     | 75                      |
| 5     | 5-H                | 2-CH(CH <sub>3</sub> ) <sub>2</sub> | 120  | 3ae     | 68                      |
| 6     | 5-H                | 4-OCH <sub>3</sub>                  | 120  | 3af     | 77                      |
| 7     | 5-H                | 2-C(CH <sub>3</sub> ) <sub>3</sub>  | 120  | 3ag     | 85                      |
| 8     | 5-H                | 4-C(CH <sub>3</sub> ) <sub>3</sub>  | 120  | 3ah     | 88                      |
| 9     | 5-H                | 2-Naphthol                          | 120  | 3ai     | 73                      |
| 10    | 5-H                | 2-Cl                                | 120  | 3aj     | 36                      |
| 11    | 5-H                | 4-Cl                                | 120  | 3ak     | 21                      |
| 12    | 5-H                | 4-Br                                | 120  | 3al     | 17                      |
| 13    | 5-H                | 4-I                                 | 120  | 3am     | trace                   |
| 14    | 5-CH <sub>3</sub>  | H                                   | 120  | 3ba     | 79                      |
| 15    | 5-OCH <sub>3</sub> | H                                   | 120  | 3ca     | 72                      |
| 16    | 5-Cl               | H                                   | 120  | 3da     | 28                      |

<sup>a</sup> 2-Nitrobenzyl alcohol (0.5 mmol), phenol (0.5 mmol), toluene (1 ml), Cu(OTf)<sub>2</sub> (36.4 mg, 0.1 mmol), 1,10-phenanthroline (10 mol%), K<sub>3</sub>PO<sub>4</sub> (212 mg, 1 mmol), 120 °C. <sup>b</sup> GC-yields.

## Characterization data of all substances

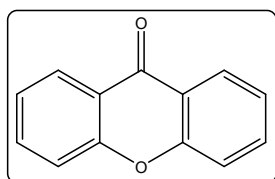

### **3aa** 9H-Xanthen-9-one

Compound **3aa** was prepared according to the general procedure and purified by column chromatography (Petroleum Ether: EtOAc= 10:1) to give a white solid. <sup>1</sup>H-NMR (400 MHz, CDCl<sub>3</sub>): δ (ppm) = 7.39 (td, *J* = 8 Hz, 2H), 7.50 (q, *J* = 4 Hz, 2H), 7.73 (td, *J* = 4 Hz, 2H), 8.35 (dd, *J* = 8 Hz, 2H). <sup>13</sup>C-NMR (100 MHz, CDCl<sub>3</sub>): δ (ppm) = 117.6, 117.7, 118.2, 118.7, 121.8, 123.2, 124.3, 126.5, 126.8, 134.2, 134.9, 156.1, 177.2.

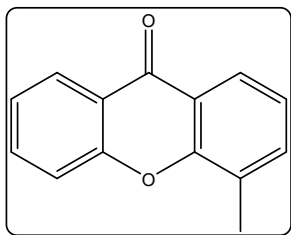

**3ab** 4-Methyl-9H-xanthen-9-one

Compound **3ab** was prepared according to the general procedure and purified by column chromatography (Petroleum Ether: EtOAc= 10:1) to give a pale yellow solid.  $^1\text{H-NMR}$  (400 MHz,  $\text{CDCl}_3$ ):  $\delta$  (ppm) =2.58 (s, 3H), 7.28 (t,  $J$ = 8 Hz, 1H), 7.39 (t,  $J$ = 8 Hz, 1H), 7.56 (t,  $J$ = 8 Hz, 2H), 7.73 (t,  $J$ = 12 Hz, 1H), 8.20 (dd,  $J$ = 12 Hz, 1H), 8.35 (dd,  $J$ = 8 Hz, 1H).  $^{13}\text{C-NMR}$  (100 MHz,  $\text{CDCl}_3$ ):  $\delta$  (ppm) =16.0, 118.3, 121.9, 121.9, 123.6, 124.1, 124.5, 126.9, 127.5, 134.9, 135.9, 154.8, 156.3, 177.8.

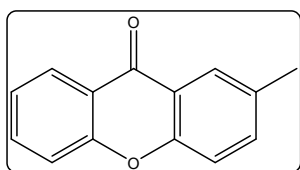

**3ac(3ba)** 2-Methyl-4aH-xanthen-9(9aH)-one

Compound **3ac** was prepared according to the general procedure and purified by column chromatography (Petroleum Ether: EtOAc= 10:1) to give a yellow solid.  $^1\text{H-NMR}$  (400 MHz,  $\text{CDCl}_3$ ):  $\delta$  (ppm) =2.44 (s, 3H), 7.35 (d,  $J$ = 8 Hz, 2H), 7.44 (d,  $J$ = 8 Hz, 1H), 7.49 (dd,  $J$ = 8 Hz, 1H), 7.68 (t,  $J$ = 8 Hz, 1H), 8.09 (s, 1H), 8.32 (dd,  $J$ = 8 Hz, 1H).  $^{13}\text{C-NMR}$  (100 MHz,  $\text{CDCl}_3$ ):  $\delta$  (ppm) =21.0, 117.9, 118.1, 121.6, 121.9, 123.8, 126.1, 126.8, 133.8, 134.8, 136.2, 154.5, 156.3, 177.4.

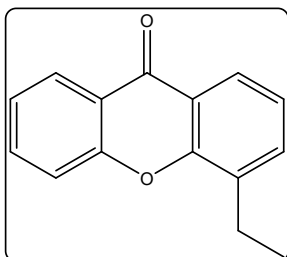

**3ad** 4-Ethyl-4aH-xanthen-9(9aH)-one

Compound **3ad** was prepared according to the general procedure and purified by column

chromatography (Petroleum Ether: EtOAc= 10:1) to give a yellow solid.  $^1\text{H-NMR}$  (400 MHz,  $\text{CDCl}_3$ ):  $\delta$  (ppm) = 1.36 (t,  $J$  = 8 Hz, 3H), 3.00 (q,  $J$  = 4 Hz, 2H), 7.30 (t,  $J$  = 8 Hz, 1H), 7.37 (t,  $J$  = 8 Hz, 1H), 7.53(d,  $J$  = 8 Hz, 1H), 7.58(d,  $J$  = 8 Hz, 1H), 7.72 (t,  $J$  = 8 Hz, 1H), 8.20 (dd,  $J$  = 8 Hz, 1H), 8.34 (dd,  $J$  = 8 Hz, 1H).  $^{13}\text{C-NMR}$  (100 MHz,  $\text{CDCl}_3$ ):  $\delta$  (ppm) = 14.3, 23.1, 118.2, 121.8, 121.9, 123.8, 124.0, 124.5, 126.9, 133.3, 134.3, 134.8, 154.4, 156.2, 177.8.

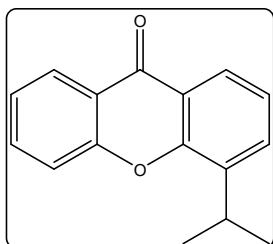

**3ae** 4-Isopropyl-4aH-xanthen-9-one

Compound **3ae** was prepared according to the general procedure and purified by column chromatography (Petroleum Ether: EtOAc= 10:1) to give a yellow solid.  $^1\text{H-NMR}$  (400 MHz,  $\text{CDCl}_3$ ):  $\delta$  (ppm) = 1.38 (d,  $J$  = 8 Hz, 6H), 3.71 (quint,  $J$  = 8 Hz, 1H), 7.35 (quint,  $J$  = 8 Hz, 2H), 7.52 (dd,  $J$  = 8 Hz, 1H), 7.64 (dd,  $J$  = 8 Hz, 1H), 7.71 (t,  $J$  = 8 Hz, 1H), 8.20 (dd,  $J$  = 8 Hz, 1H), 8.34 (dd,  $J$  = 8 Hz, 1H).  $^{13}\text{C-NMR}$  (100 MHz,  $\text{CDCl}_3$ ):  $\delta$  (ppm) = 22.9, 27.3, 118.1, 121.7, 122.0, 122.2, 123.8, 124.0, 124.3, 126.8, 131.7, 134.8, 137.7, 153.8, 156.2, 177.8.

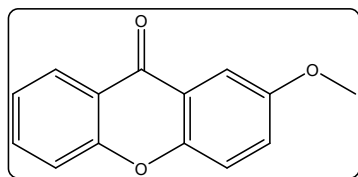

**3af(3ca)** 2-Methoxy-9H-xanthen-9-one

Compound **3af** was prepared according to the general procedure and purified by column chromatography (Petroleum Ether: EtOAc= 10:1) to give a white solid.  $^1\text{H-NMR}$  (400 MHz,  $\text{CDCl}_3$ ):  $\delta$  (ppm) = 3.92 (s, 3H), 7.35 (m, 2H), 7.46 (q,  $J$  = 8 Hz, 2H), 7.70(t,  $J$  = 8 Hz, 2H), 8.34(dd,  $J$  = 8 Hz, 1H).  $^{13}\text{C-NMR}$  (100 MHz,  $\text{CDCl}_3$ ):  $\delta$  (ppm) = 56.0, 105.9, 118.0, 119.5, 121.3, 122.2, 123.8, 125.0, 126.7, 134.6, 151.1, 156.1, 156.2, 177.2.

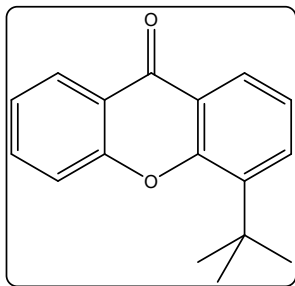

**3ag** 4-Tert-butyl-4aH-xanthen-9(9aH)-one

Compound **3ag** was prepared according to the general procedure and purified by column chromatography (Petroleum Ether: EtOAc= 10:1) to give a yellow solid. <sup>1</sup>H-NMR (400 MHz, CDCl<sub>3</sub>): δ (ppm) =1.58 (s, 9H), 7.32 (t, *J* = 8 Hz, 1H), 7.40 (t, *J* = 8 Hz, 1H), 7.56 (d, *J* = 8 Hz, 2H), 7.73 (m, 1H), 8.26 (dd, *J* = 8 Hz, 1H), 8.35 (dd, *J* = 8 Hz, 1H). <sup>13</sup>C-NMR (100 MHz, CDCl<sub>3</sub>): δ (ppm) =30.2, 30.3, 35.4, 118.1, 121.6, 122.7, 123.7, 123.9, 124.1, 125.1, 126.9, 132.2, 134.9, 139.0, 155.2, 155.8, 177.9.

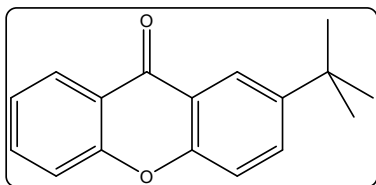

**3ah** 2-Tert-butyl-4aH-xanthen-9(9aH)-one

Compound **3ah** was prepared according to the general procedure and purified by column chromatography (Petroleum Ether: EtOAc= 10:1) to give a yellow solid. <sup>1</sup>H-NMR (400 MHz, CDCl<sub>3</sub>): δ (ppm) =1.39 (s, 9H), 7.40 (m, 3H), 7.69 (t, *J* = 12 Hz, 1H), 7.77 (dd, *J* = 12 Hz, 1H), 8.34 (d, *J* = 8 Hz, 2H). <sup>13</sup>C-NMR (100 MHz, CDCl<sub>3</sub>): δ (ppm) =31.5, 31.7, 34.9, 117.8, 118.1, 121.3, 122.0, 122.6, 123.9, 126.0, 126.9, 132.9, 134.8, 147.3, 154.5, 156.4, 177.6.

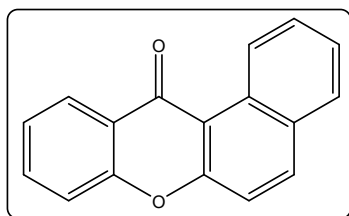

**3ai** 12H-Benzo[a]xanthen-12-one

Compound **3ai** was prepared according to the general procedure and purified by column chromatography (Petroleum Ether: EtOAc= 10:1) to give a yellow solid. <sup>1</sup>H-NMR (400 MHz, CDCl<sub>3</sub>): δ (ppm) =7.24 – 7.41 (m, 2H), 7.53 (d, *J* = 6.3 Hz, 1H), 7.58 (d, *J* = 5.5 Hz, 1H), 7.69 –

7.76 (m, 2H), 7.83 (d,  $J = 6.0$  Hz, 1H), 8.20 (d,  $J = 6.0$  Hz, 1H), 8.34 (d,  $J = 6.0$  Hz, 1H), 8.72 (d,  $J = 6.0$  Hz, 1H).  $^{13}\text{C}$ -NMR (100 MHz,  $\text{CDCl}_3$ ):  $\delta$  (ppm) = 118.0, 121.6, 121.7, 123.6, 123.8, 124.3, 126.1, 126.3, 126.8, 126.9, 129.4, 131.0, 134.6, 137.0, 154.1, 156.0, 177.6.

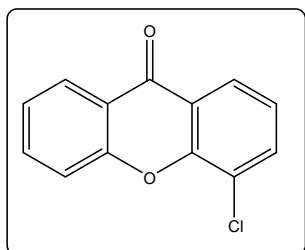

**3aj** 4-Chloro-9H-xanthen-9-one

Compound **3aj** was prepared according to the general procedure and purified by column chromatography (Petroleum Ether: EtOAc= 10:1) to give a yellow solid.  $^1\text{H}$ -NMR (400 MHz,  $\text{CDCl}_3$ ):  $\delta$  (ppm) = 7.40 – 7.46 (m, 2H), 7.62 (d,  $J = 6.3$  Hz, 1H), 7.74 – 7.85 (m, 2H), 8.05 (d,  $J = 6.1$  Hz, 1H), 8.48 (d,  $J = 8$  Hz, 1H).  $^{13}\text{C}$ -NMR (100 MHz,  $\text{CDCl}_3$ ):  $\delta$  (ppm) = 118.2, 118.3, 121.8, 121.9, 123.5, 124.3, 125.2, 126.5, 126.8, 134.7, 134.9, 156.1, 177.2.

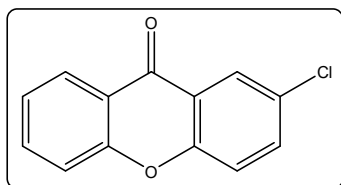

**3ak** 2-Chloro-9H-xanthen-9-one

Compound **3ak** was prepared according to the general procedure and purified by column chromatography (Petroleum Ether: EtOAc= 10:1) to give a yellow solid.  $^1\text{H}$ -NMR (400 MHz,  $\text{CDCl}_3$ ):  $\delta$  (ppm) = 7.24 – 7.46 (m, 2H), 7.52 (d,  $J = 6.3$  Hz, 2H), 7.75 (t,  $J = 5.8$  Hz, 2H), 8.36 (d,  $J = 6.0$  Hz, 1H).  $^{13}\text{C}$ -NMR (100 MHz,  $\text{CDCl}_3$ ):  $\delta$  (ppm) = 118.3, 121.1, 121.8, 123.5, 124.3, 124.8, 125.3, 126.8, 134.2, 134.8, 151.1, 156.1, 177.2.

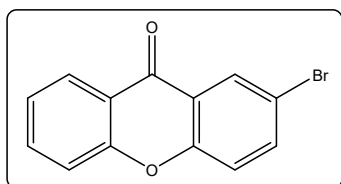

**3al** 2-Bromo-9H-xanthen-9-one

Compound **3al** was prepared according to the general procedure and purified by column chromatography (Petroleum Ether: EtOAc= 10:1) to give a yellow solid. <sup>1</sup>H-NMR (400 MHz, CDCl<sub>3</sub>): δ (ppm) =7.43 (dt, J = 7.7, 3.2 Hz, 2H), 7.52 (d, J = 8.5 Hz, 1H), 7.73 – 7.86 (m, 2H), 8.35 (d, J = 8.1 Hz, 1H), 8.48 (d, J = 2.5 Hz, 1H). <sup>13</sup>C-NMR (100 MHz, CDCl<sub>3</sub>): δ (ppm) =117.0, 117.7, 119.6, 121.4, 123.0, 126.9, 129.0, 129.3, 135.2, 137.6, 154.8, 155.9, 175.9.



# NMR Spectra of all compounds

**3aa** 9H-Xanthen-9-one

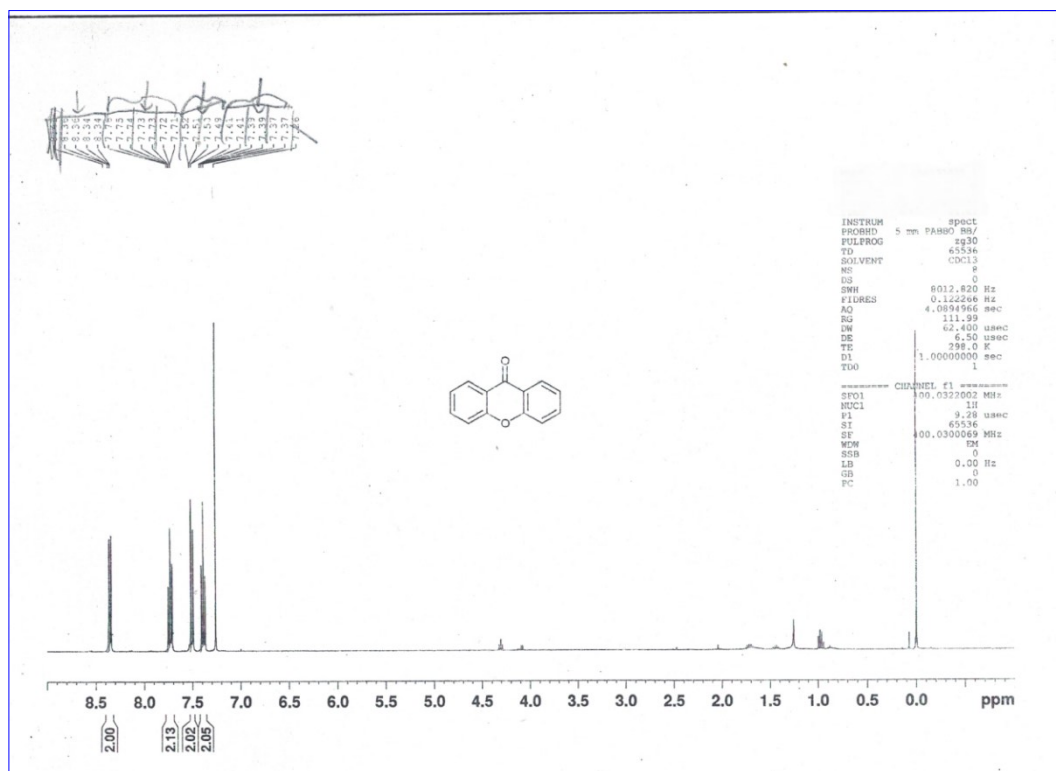

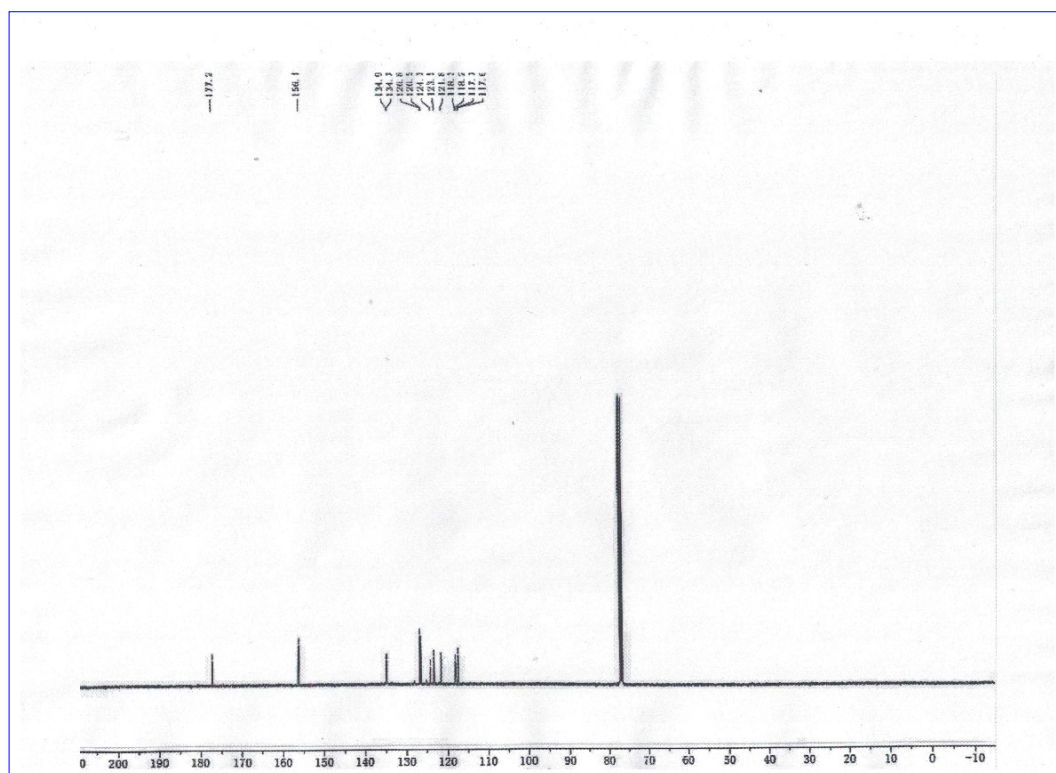

**3ab** 4-Methyl-9H-xanthen-9-one

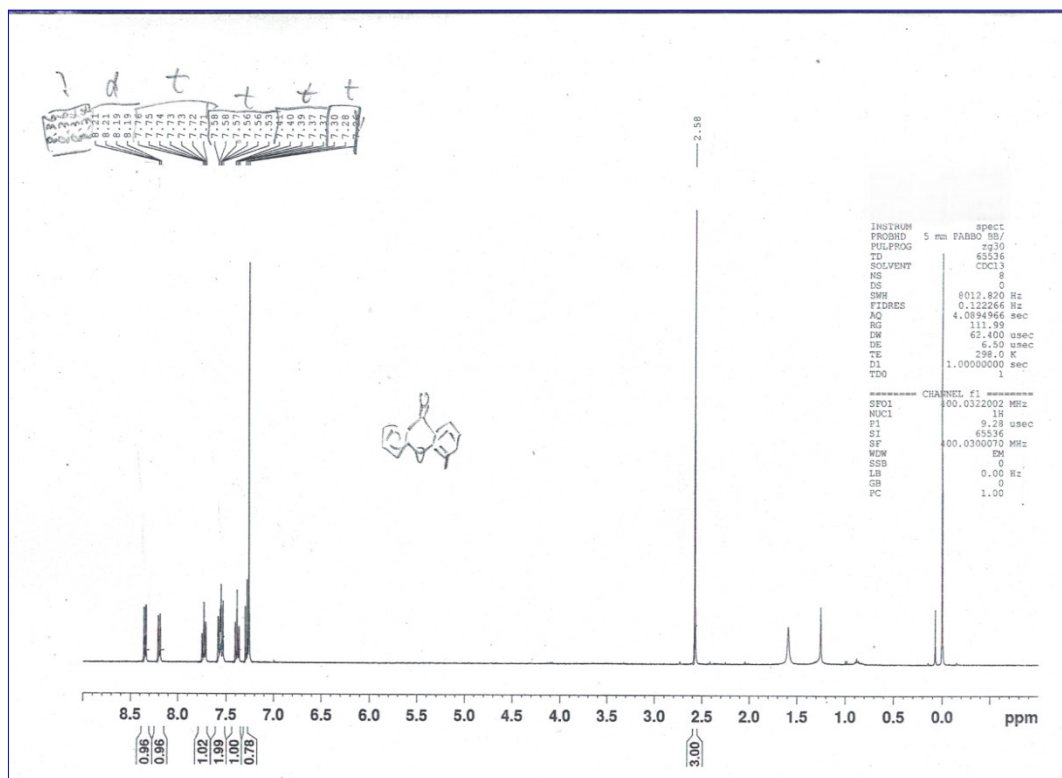

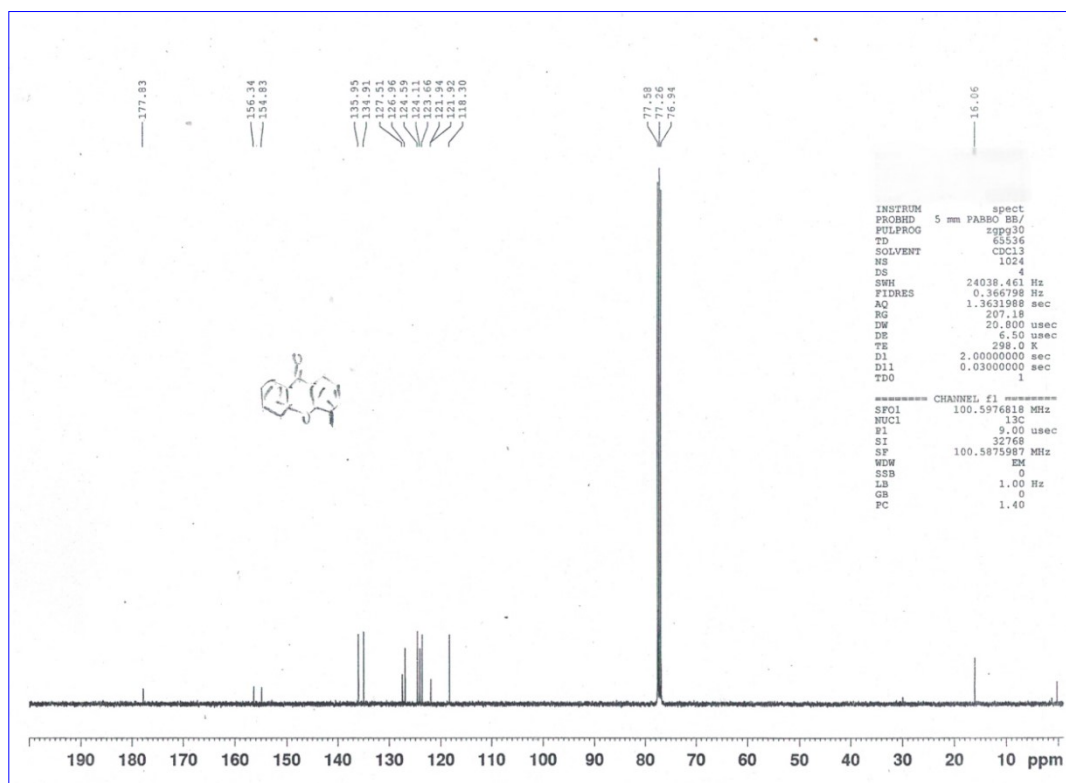

**3ac** 2-Methyl-4aH-xanthen-9(9aH)-one

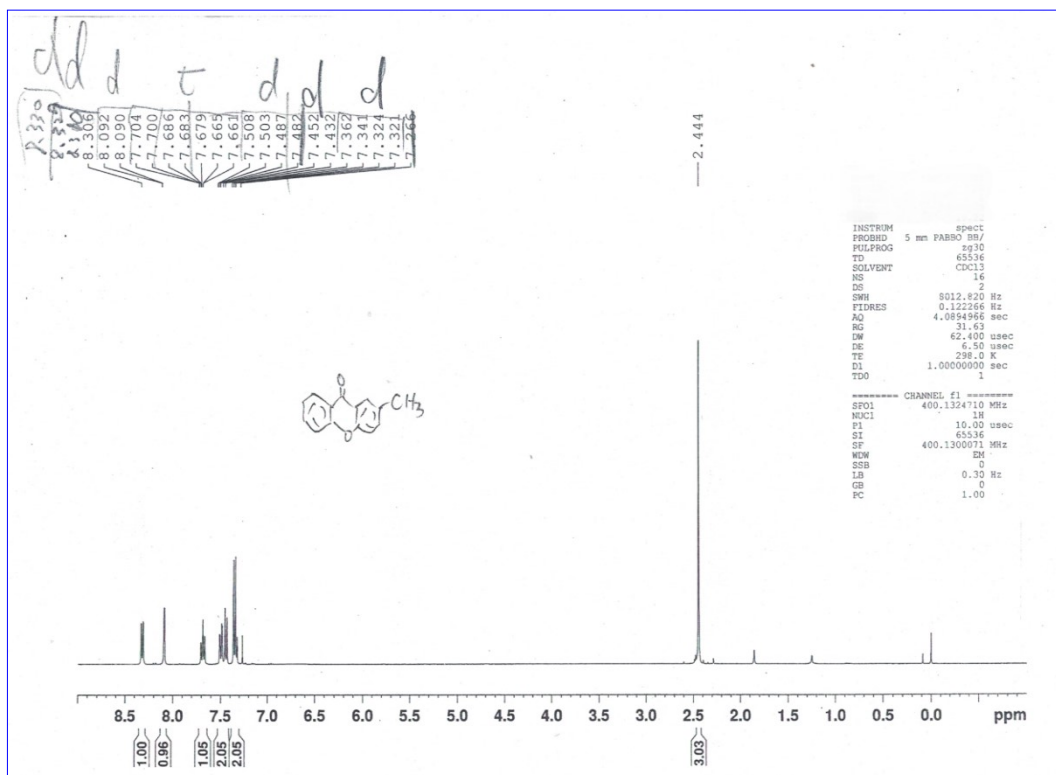

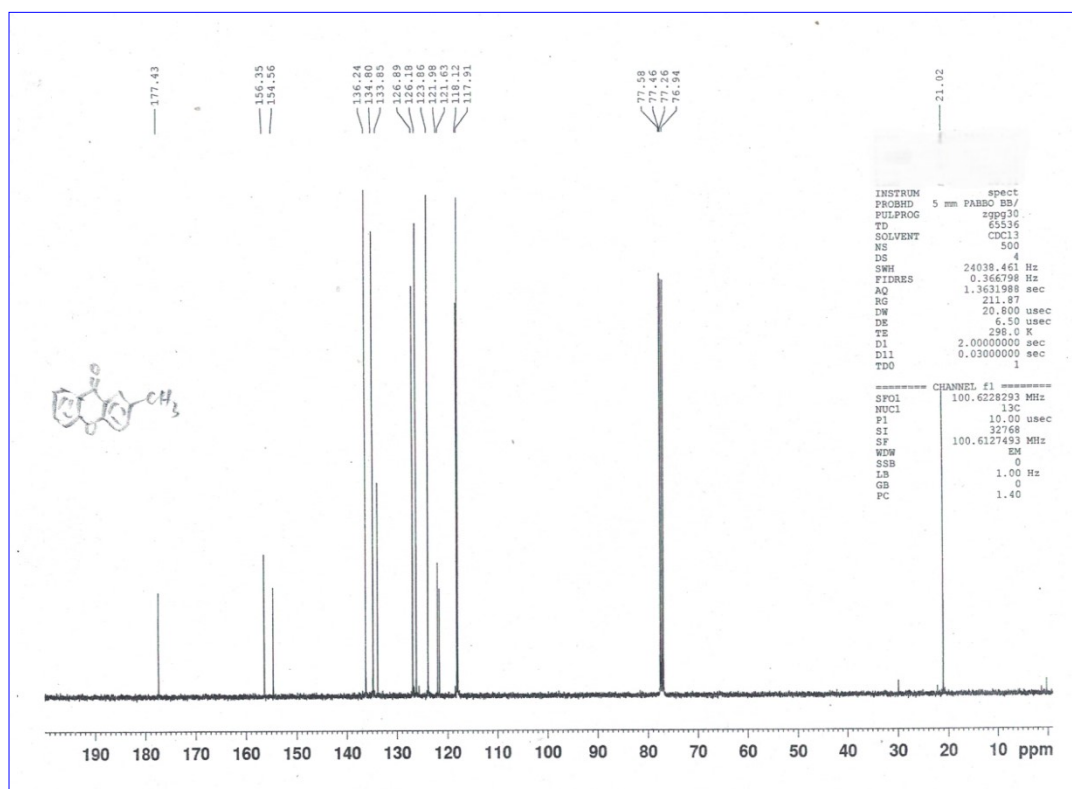

**3ad** 4-Ethyl-4aH-xanthen-9(9aH)-one

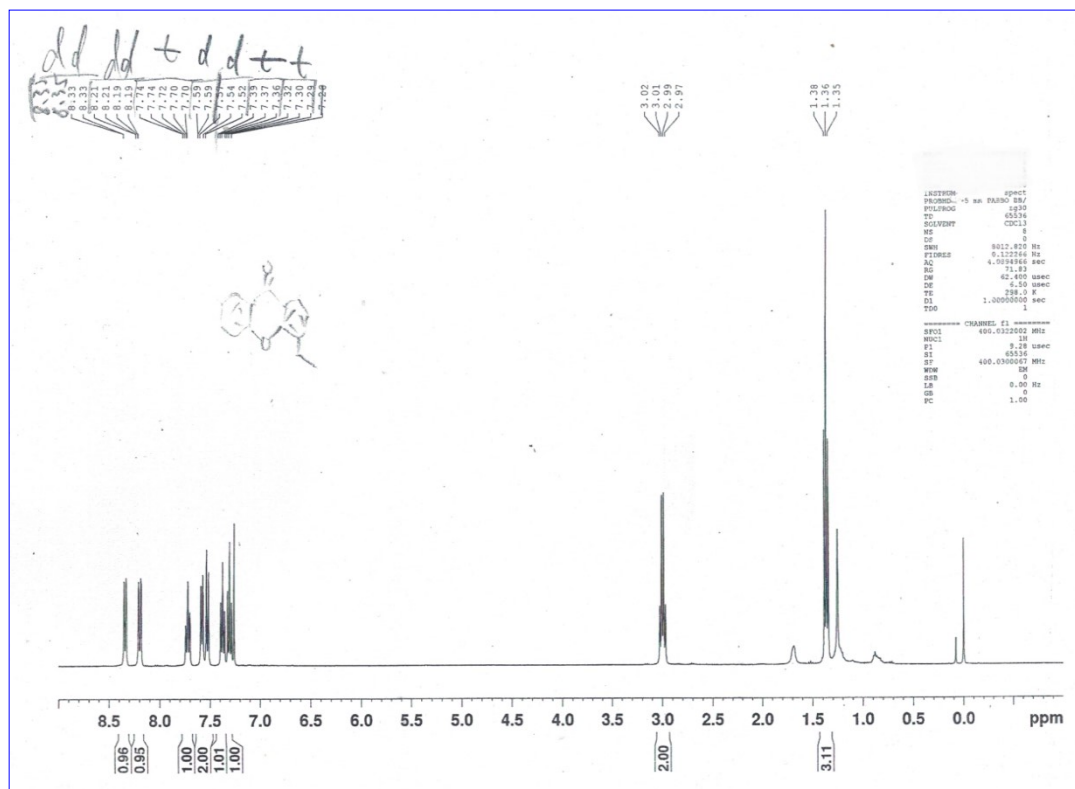

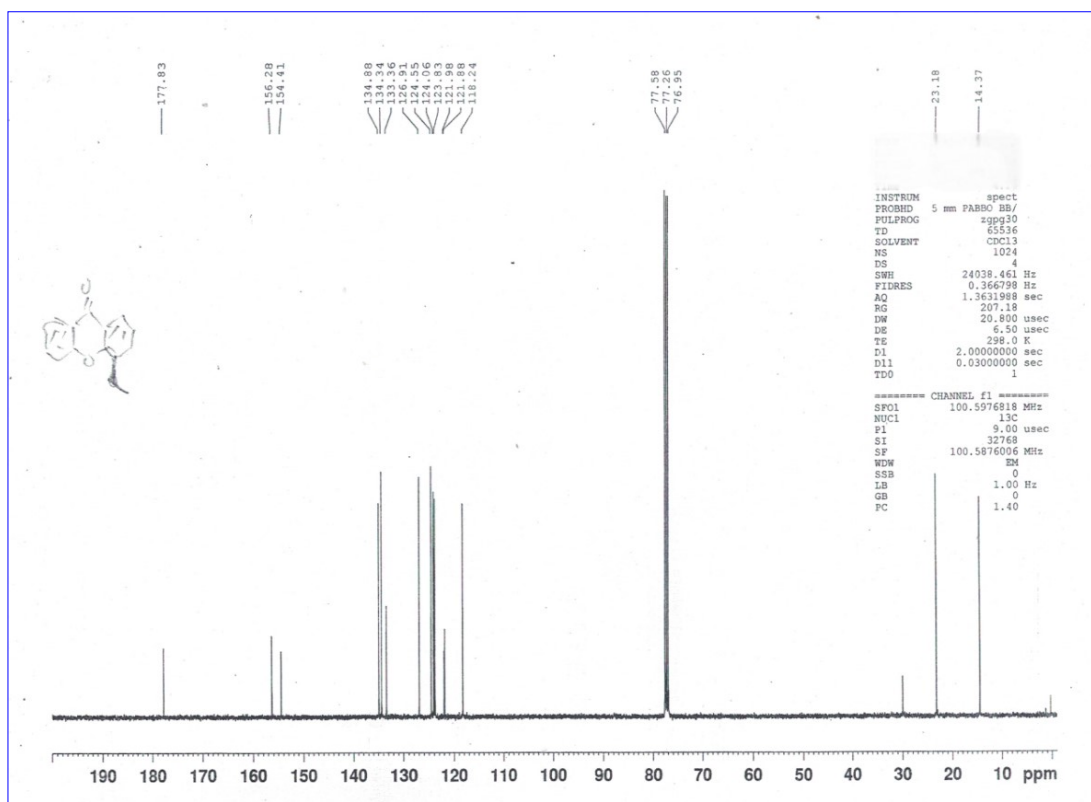

**3ae** 4-Isopropyl-4aH-xanthen-9(9aH)-one



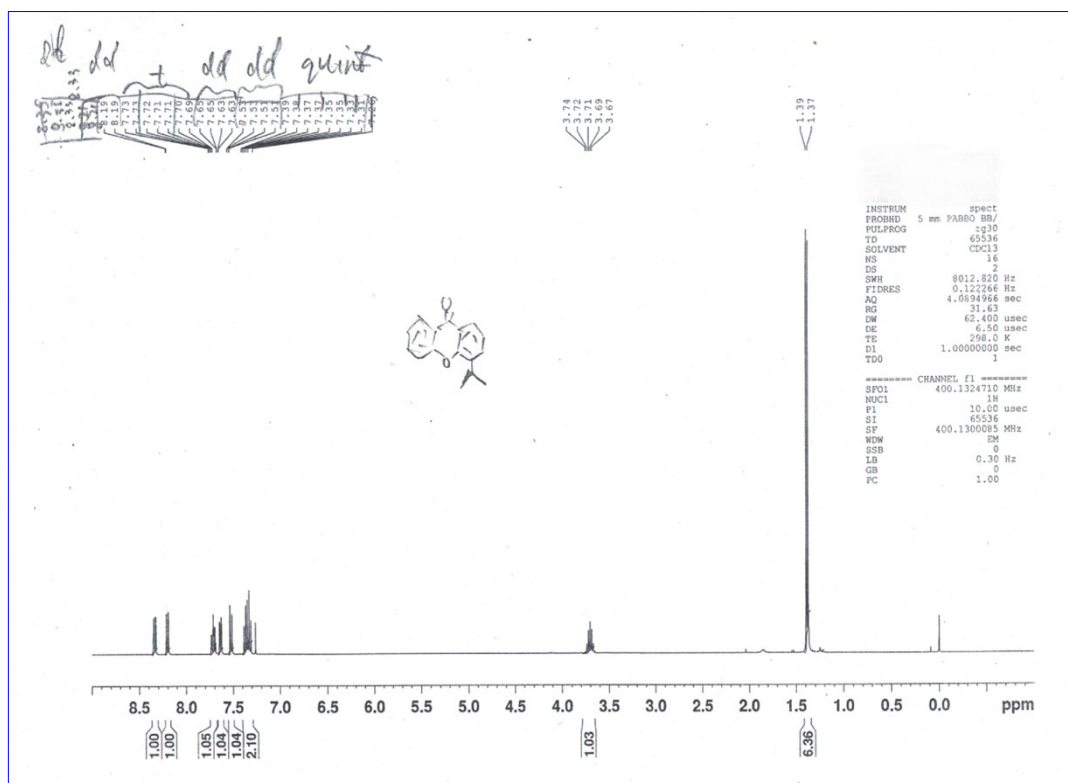

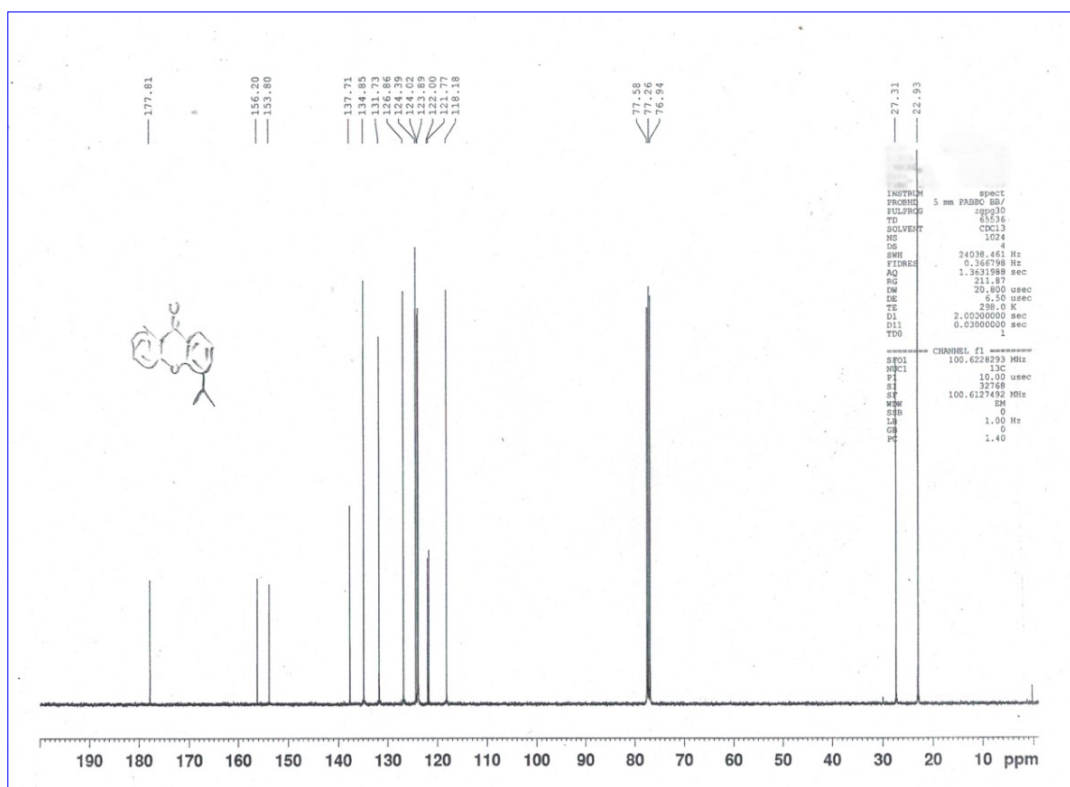

**3af** 2-Methoxy-9H-xanthen-9-one

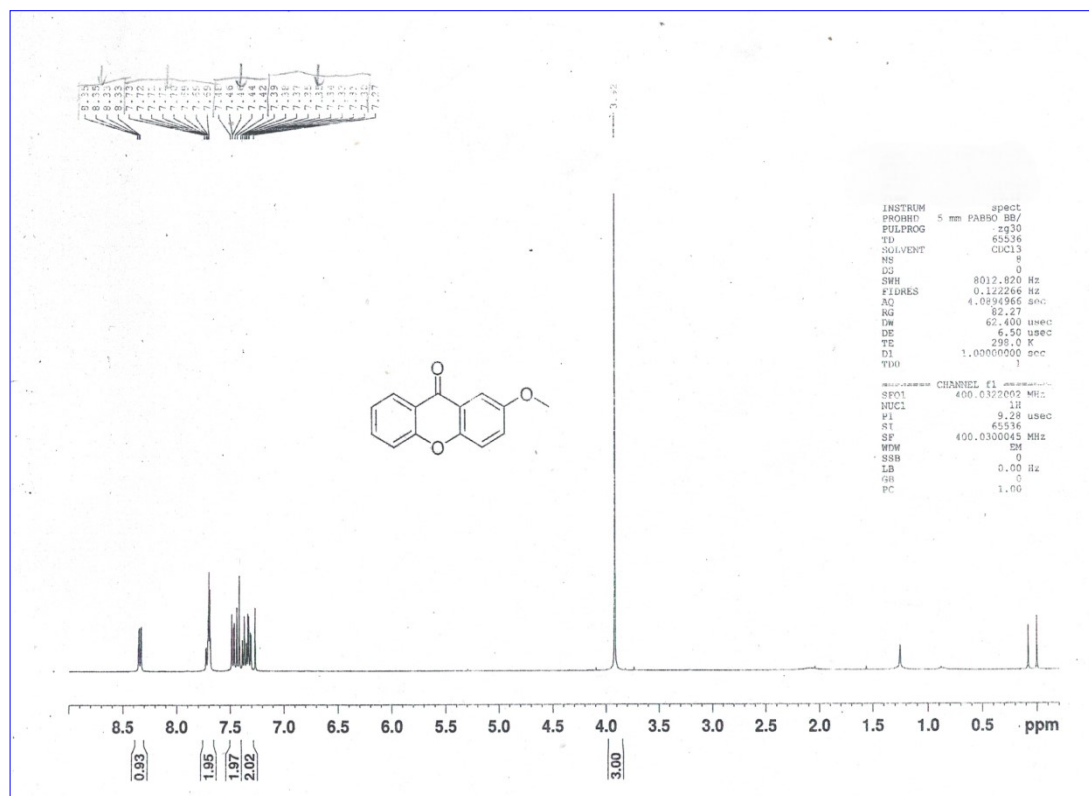

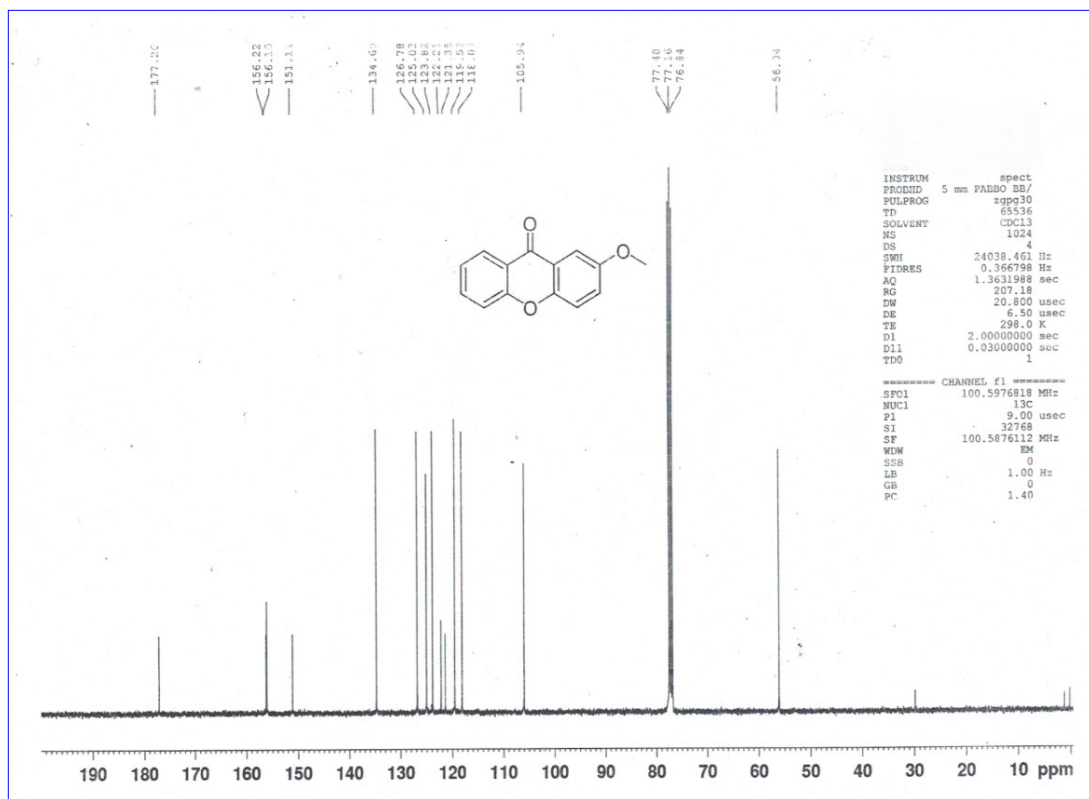

**3ag** 4-Tert-butyl-4aH-xanthen-9(9aH)-one

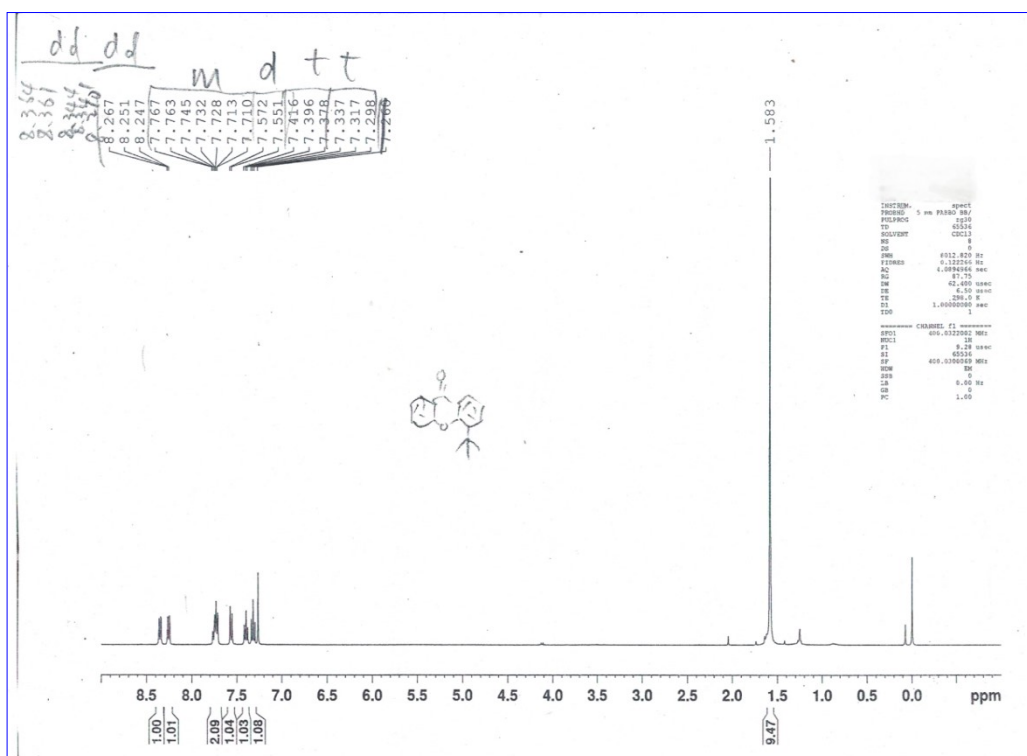

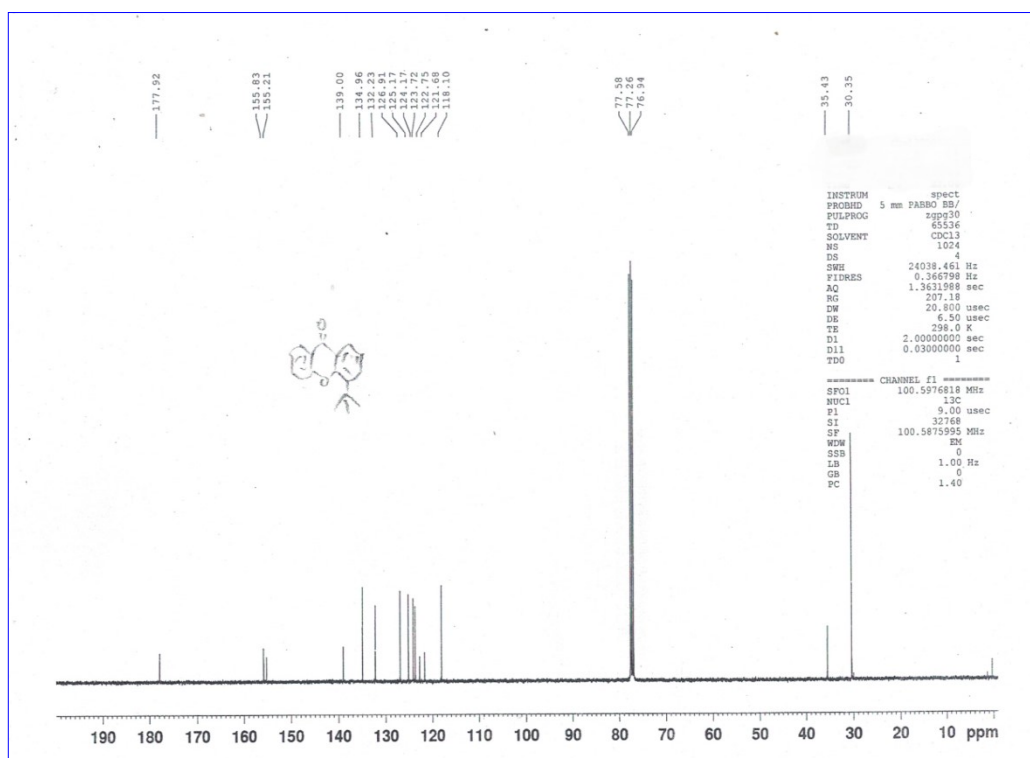

**3ah** 2-Tert-butyl-4aH-xanthen-9(9aH)-one

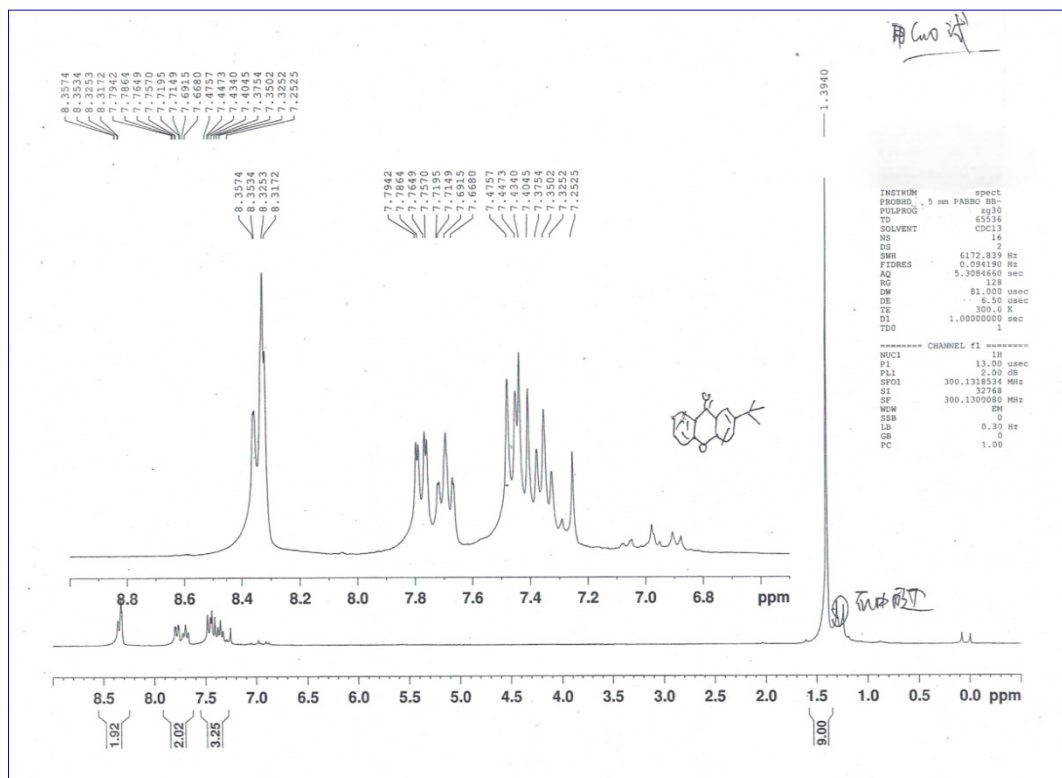





**3ai** 12H-Benzo[a]xanthen-12-one

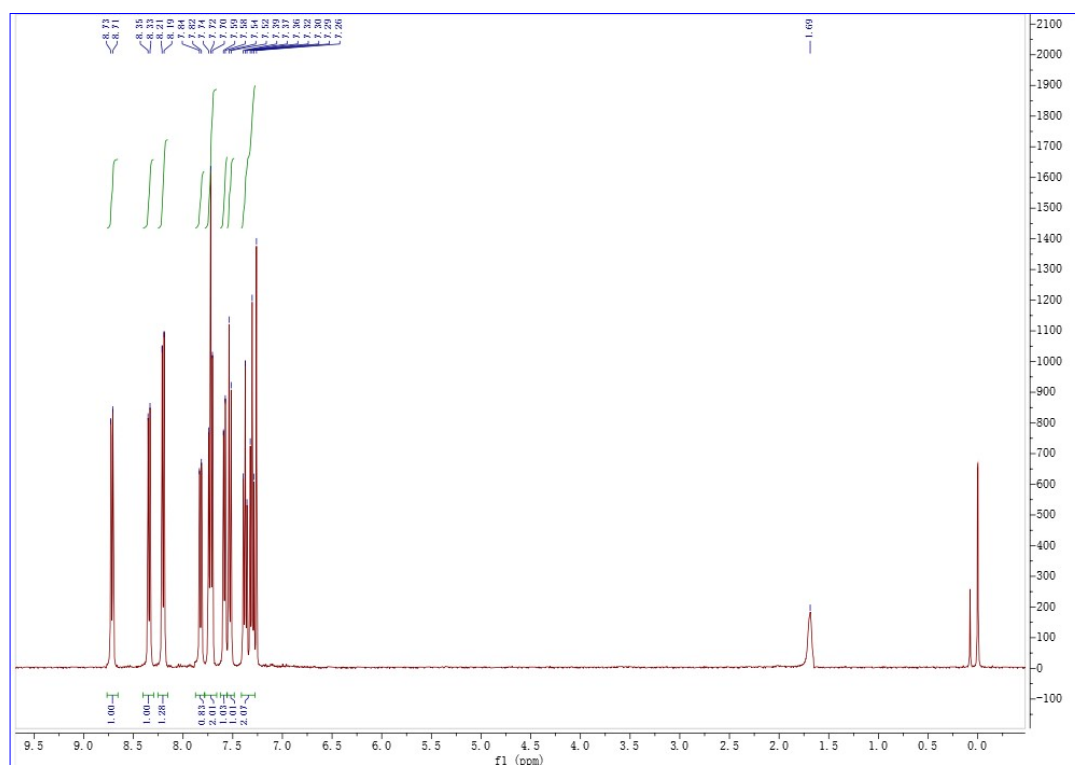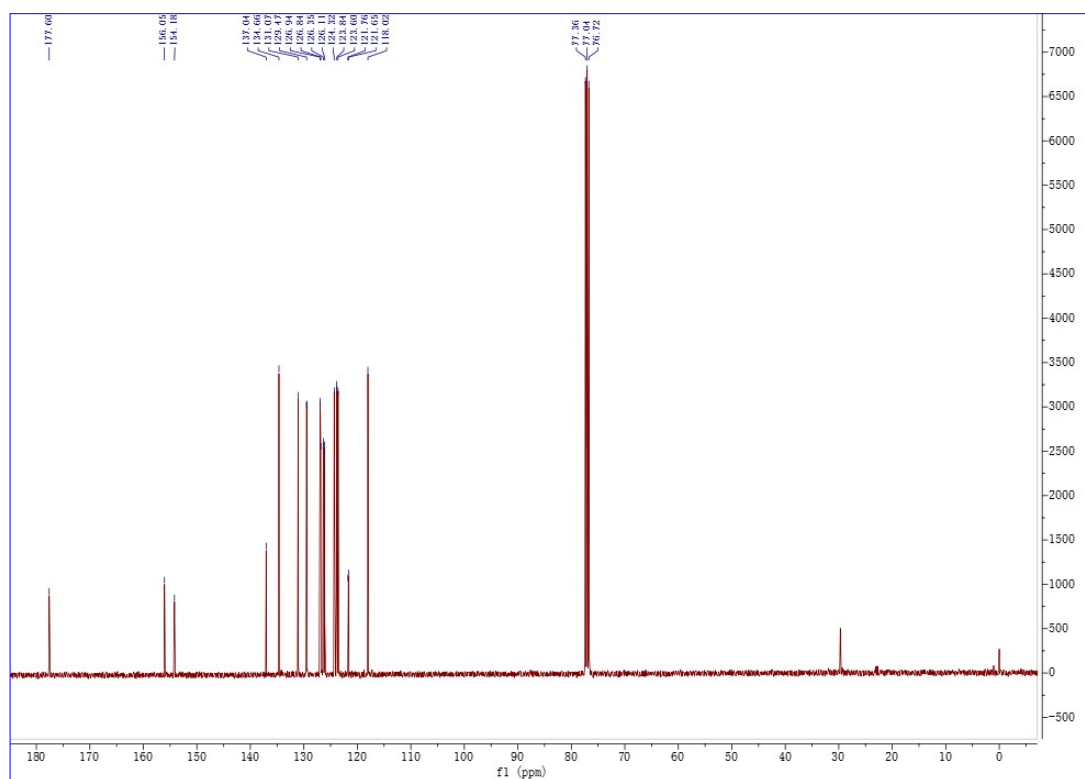

**3aj** 2-Chloro-9H-xanthen-9-one

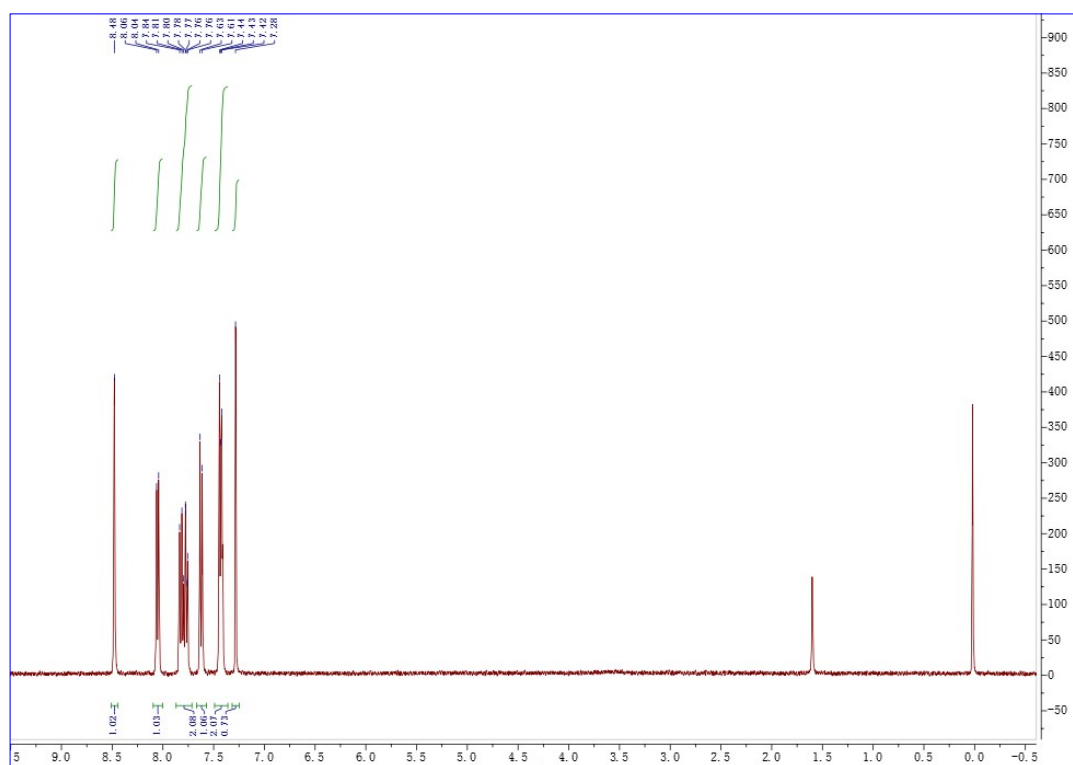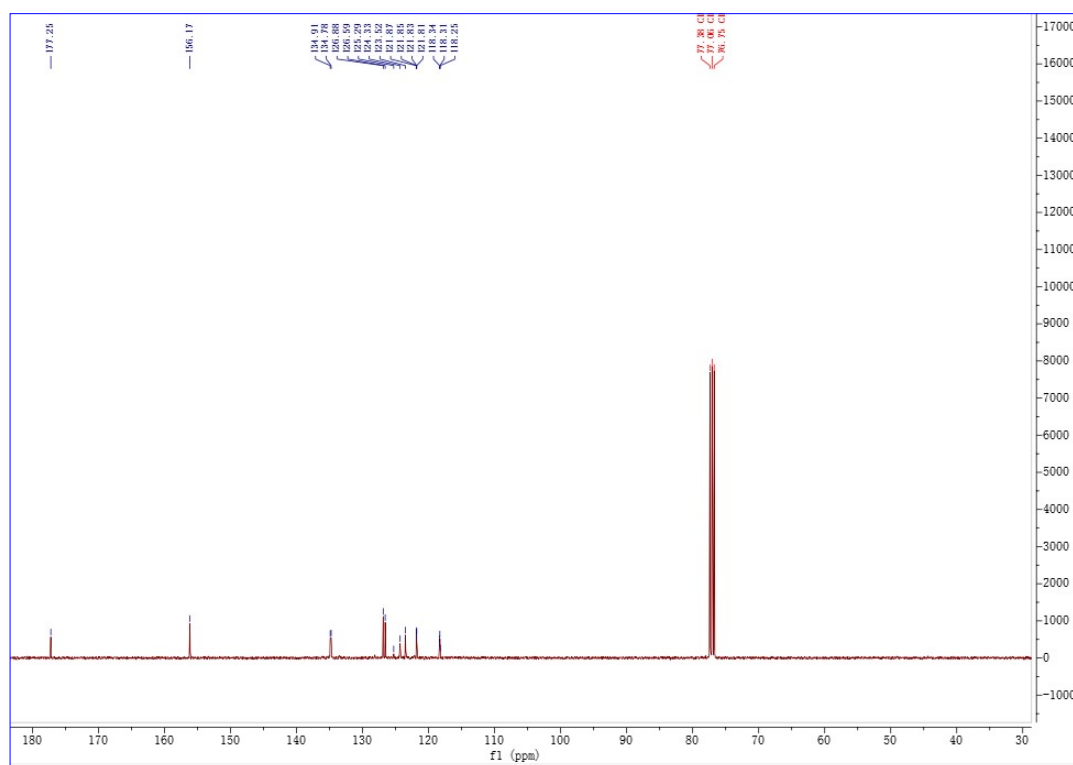

**3ak** 4-Chloro-9H-xanthen-9-one

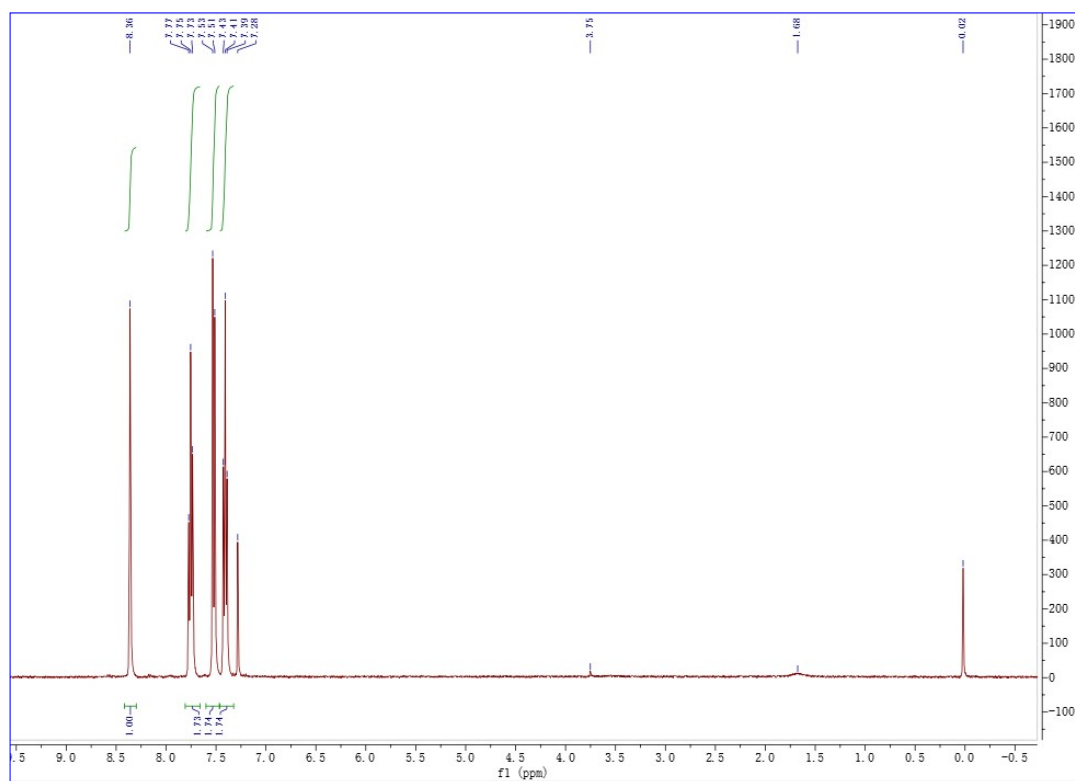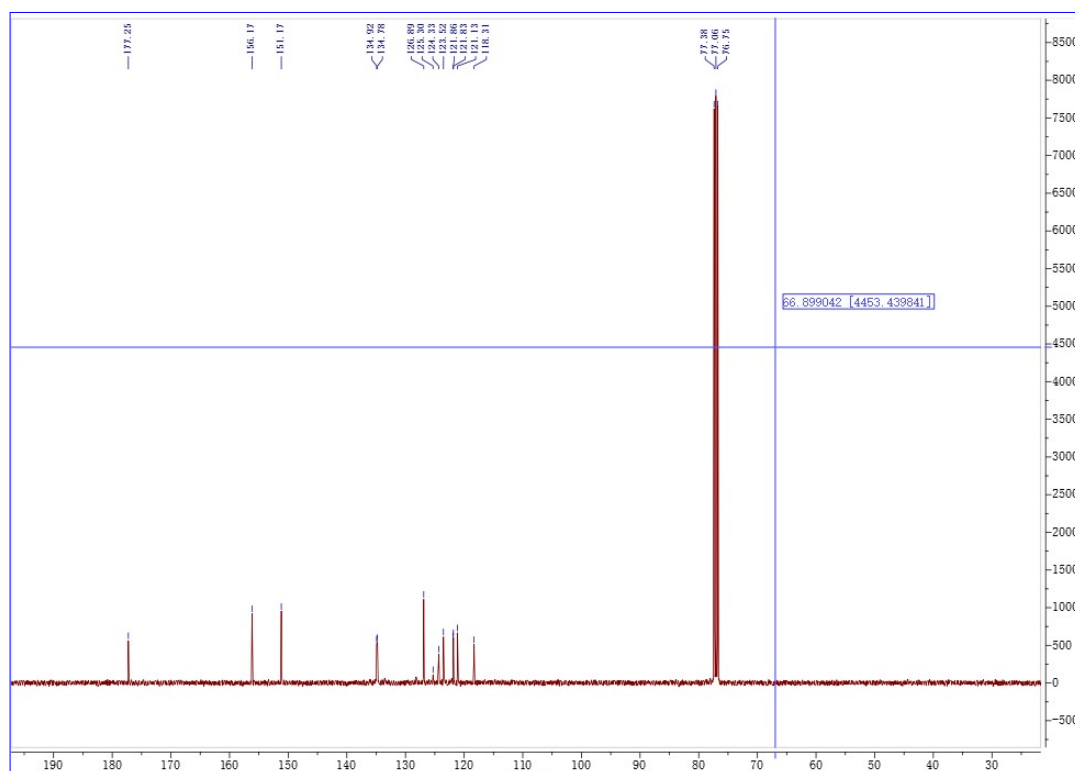

### 3al 2-Bromo-9H-xanthen-9-one

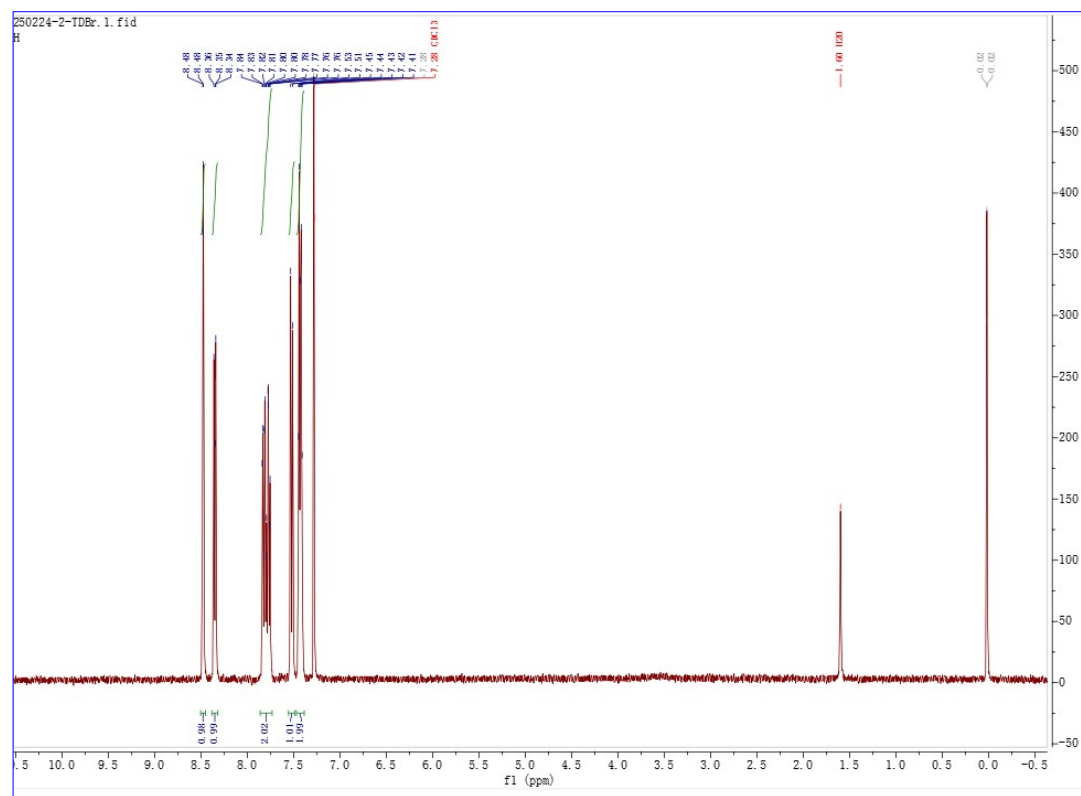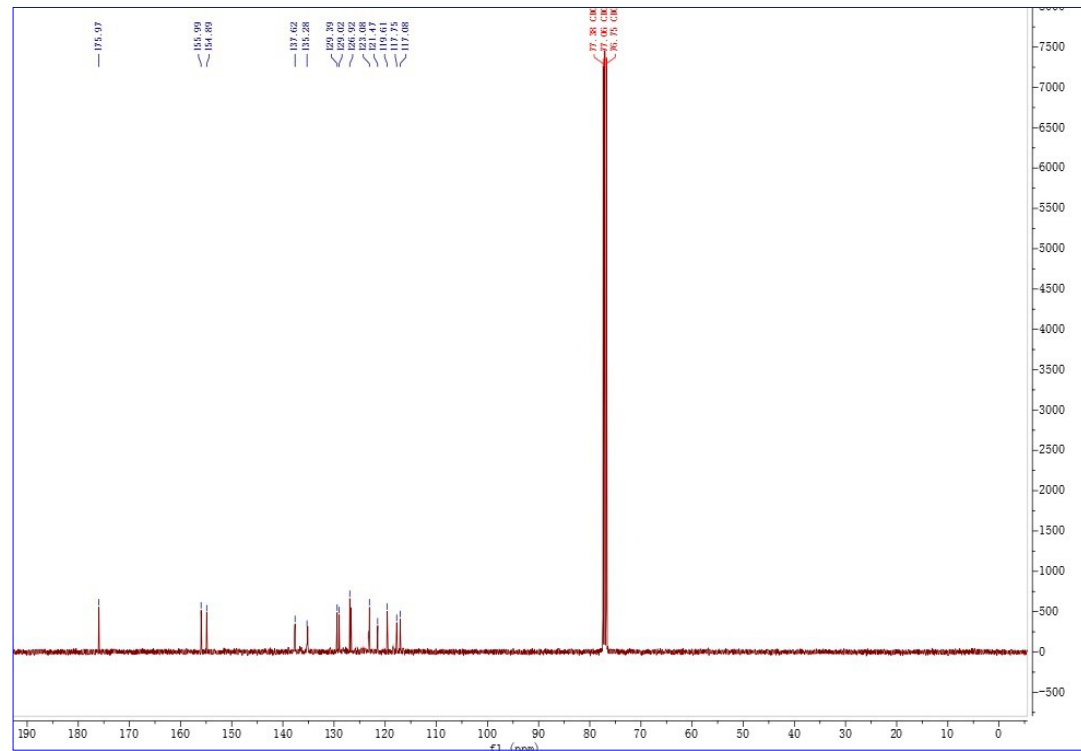

**3ba** 2-Methyl-4aH-xanthen-9(9aH)-one

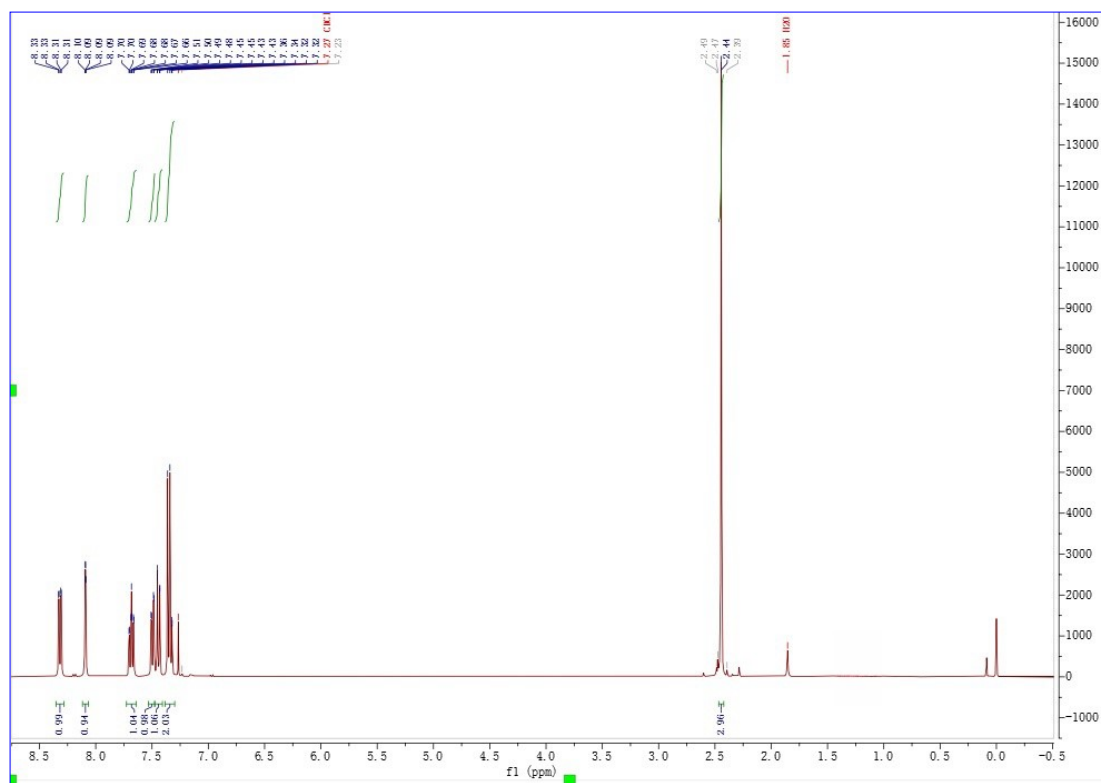

**3ca** 2-Methoxy-9H-xanthen-9-one

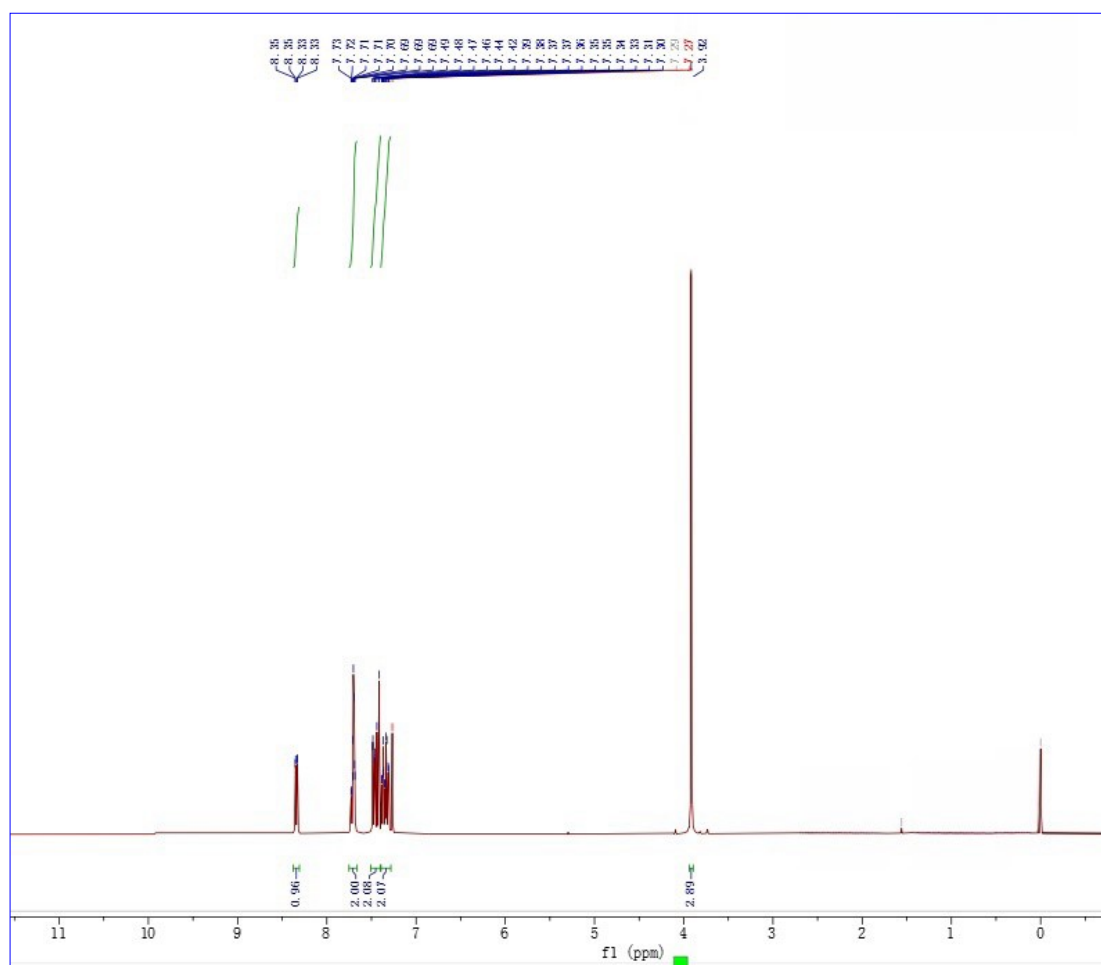

## 1-[4-(1,1-Dimethylethyl)phenoxy]-3-nitrobenzene

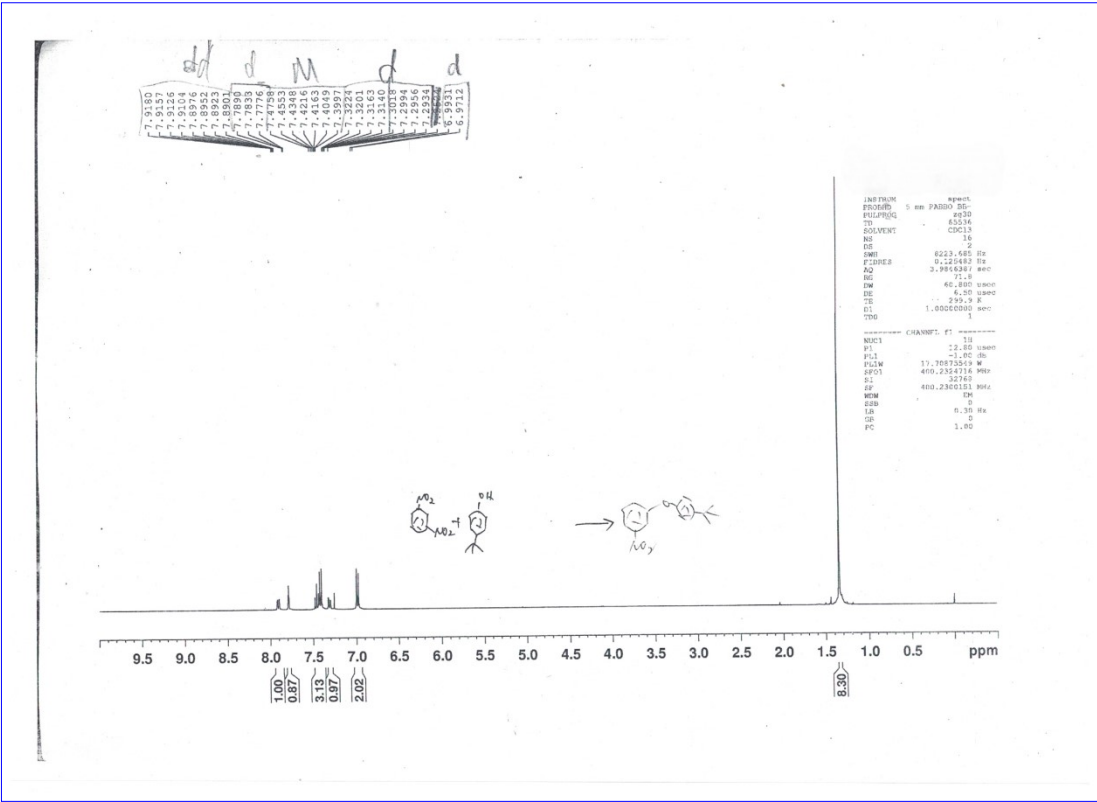

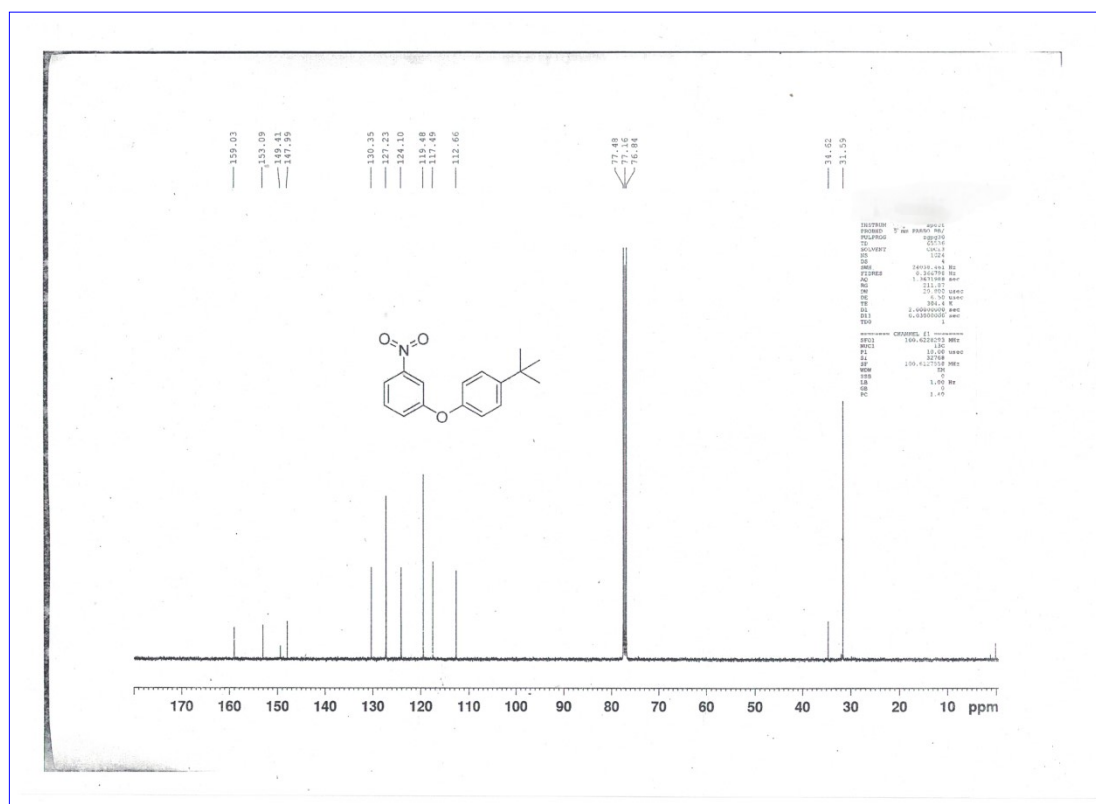

Supplement: d5ob00648a1.pdf [file d5ob00648a1.pdf]
